# Supplementary material for: Application of graphene quantum dots functionalized with thymine and thymine-appended zinc phthalocyanine as novel photoluminescent nanoprobes
Source: Royal Society of Chemistry journal article supplement (doi:10.1039/c6nj03285k), 2016-12-21
Supplement: c6nj03285k1.pdf [file c6nj03285k1.pdf]

## **Application of graphene quantum dots functionalized with thymine and thymine-appended zinc phthalocyanine as novel photoluminescent nanoprobles.**

Ojodomo J. Achadu, Tebello Nyokong\*

Department of Chemistry, Rhodes University, Grahamstown 6140, South Africa.

### **Supporting Information**

#### **Additional experimental**

**Synthesis of pristine graphene quantum dots (GQDs):** GQDs were synthesized by the top-down hydrothermal method [1]. Briefly: GO (0.5 g) was oxidized in conc. H<sub>2</sub>SO<sub>4</sub> (10 mL) and HNO<sub>3</sub> (30 mL) for 4 h under ultrasonication. The mixture was then diluted with Millipore water (100 mL) and filtered through a 0.22 μm microporous membrane. The pH of the oxidized GO was turned to 8.0 using 10% NaOH. The obtained suspension was transferred to a 400 mL Teflon-lined autoclave and heated up to 200 °C for 12 h. The product was left to cool naturally to room temperature and filtered using a 0.22 μm membrane. The collected colloidal solution was further dialyzed for two days using a dialysis membrane (MW 1.5 kDa) to remove excess acids and salts, after which GQDs with strong fluorescence were thus obtained. Powdered GQDs were obtained by freeze drying the colloidal solution.

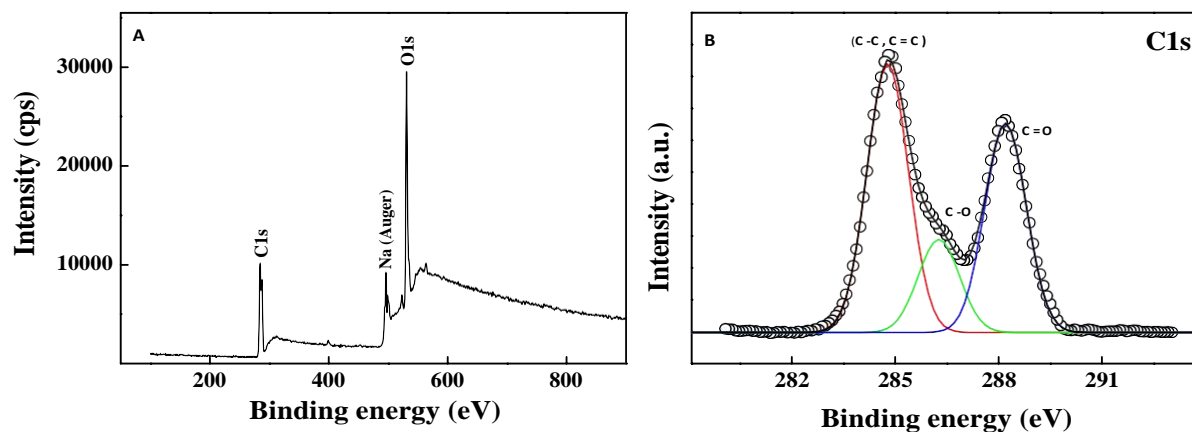

**Fig. S1.** XPS spectra of as-synthesized GQDs (A) Wide survey scan (B) High resolution spectrum of C1s.

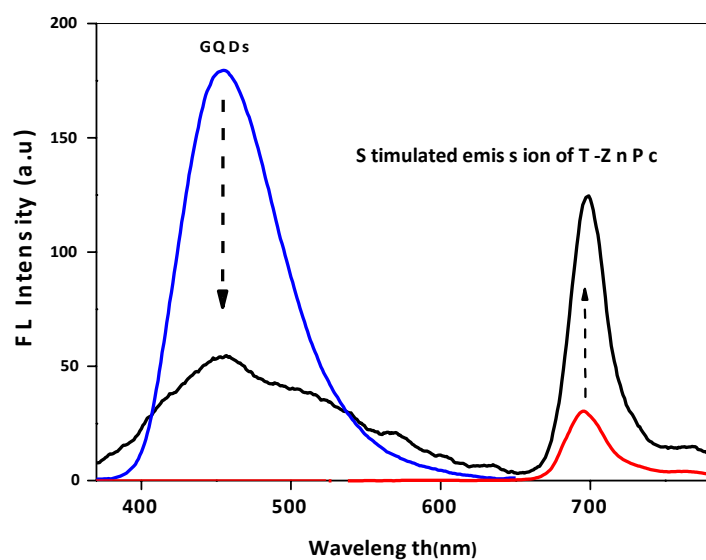

**Fig. S2.** Fluorescence emission of pristine GQDs-T-ZnPc conjugate showing stimulated emission in T-ZnPc: Solvent: Solvent: DMF/10 mM PBS, pH 7.0 (1:4).

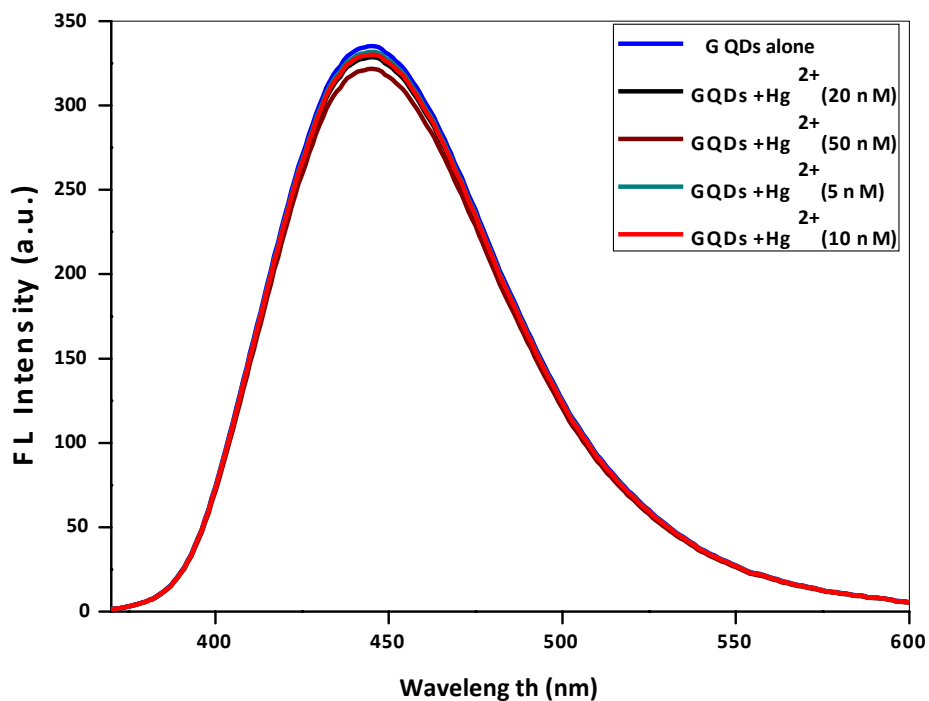

**Fig. S3.** FL intensity of pristine GQDs in the presence of various concentrations of  $\text{Hg}^{2+}$  (5-50 nM): Solvent: PBS (10 mM, pH 7.0).

**Table S1.** Comparison of the best fit fluorescence lifetime values of T-GQDs in the absence and presence of an equivalent of  $[\text{Hg}^{2+}]$  in 10 mM PBS, pH 7.0.

| Sample | $[\text{Hg}^{2+}](\text{nM})$ | $\tau_F(\text{ns}) \pm 0.10, n=3$ |
|--------|-------------------------------|-----------------------------------|
| T-GQDs | 0                             | 6.50                              |
|        | 0.1                           | 6.52                              |
|        | 10                            | 6.55                              |
|        | 20                            | 6.45                              |
|        | 50                            | 6.48                              |

**Table S2.** Comparison of the fluorescence lifetime values of GQDs-T-ZnPc probe upon titration of different concentrations of  $\text{Hg}^{2+}$ . Solvent: DMF/10 mM PBS, pH 7.0 (1:4).

| Sample      | $[\text{Hg}^{2+}]$ (nM) | $\tau_F$ (ns) |
|-------------|-------------------------|---------------|
| GQDs-T-ZnPc | 0                       | 1.95          |
|             | 5                       | 2.52          |
|             | 10                      | 2.98          |
|             | 20                      | 3.45          |
|             | 50                      | 4.02          |

## Reference

1. O.J. Achadu, I. Uddin, T. Nyokong, *J. Photochem Photobiol A: Chemistry*, 2016, 317, 12-25.
